# Supplementary material
Source: PubMed Central journal article supplement (PMC5862128)
Supplement: DC170571SupplementaryData.pdf [file DC170571SupplementaryData.pdf]

SUPPLEMENTARY DATA

**LIST OF SUPPLEMENTAL MATERIALS**

**Supplementary Table S1. Estimated diabetes cases among the Chinese population in 2010**

**Supplementary Table S2. Covariate-adjusted distribution of the risk factors for diabetes over time**

**Supplementary Figure S1 Population-Attributable-Fraction (%) of individual risk factors on risk of type 2 diabetes in 2011 by sex**

**Supplementary Text. List of references for Table 1**

SUPPLEMENTARY DATA

**Supplementary Table S1. Estimated diabetes cases among the Chinese population in 2010**

|               | Population<br>Census<br>2010* | Total Diabetes      |          | Prediabetes         |           |
|---------------|-------------------------------|---------------------|----------|---------------------|-----------|
|               |                               | Prevalence<br>(%)** | Events   | Prevalence<br>(%)** | Events    |
| <b>Male</b>   |                               |                     |          |                     |           |
| 20-29         | 114845611                     | 2.6                 | 2985986  | 7.6                 | 8728266   |
| 30-39         | 109912926                     | 5.2                 | 5715472  | 12.2                | 13409377  |
| 40-49         | 117385096                     | 11.1                | 13029746 | 17.7                | 20777162  |
| 50-59         | 81446172                      | 15.5                | 12624157 | 18.1                | 14741757  |
| 60-69         | 50582897                      | 18.1                | 9155504  | 24.1                | 12190478  |
| ≥70           | 36457064                      | 21.8                | 7947640  | 26.4                | 9624665   |
| <b>Female</b> |                               |                     |          |                     |           |
| 20-29         | 113580759                     | 1.2                 | 1362969  | 5.7                 | 6474103   |
| 30-39         | 105251236                     | 3.0                 | 3157537  | 9.2                 | 9683114   |
| 40-49         | 112963421                     | 7.3                 | 8246330  | 16.0                | 18074147  |
| 50-59         | 78619473                      | 13.1                | 10299151 | 21.1                | 16588709  |
| 60-69         | 49197667                      | 20.3                | 9987126  | 22.2                | 10921882  |
| ≥70           | 41356812                      | 22.0                | 9098499  | 26.2                | 10835485  |
| <b>Total</b>  | 1011599134                    |                     | 93610117 |                     | 152049146 |

\* Tabulation on the 2010 Population Census of the People's Republic of China. <http://www.stats.gov.cn/tjsj/pcsj/rkpc/6rp/indexch.htm> (Accessed at May 28 2016);

\*\* Yang W et al. Prevalence of Diabetes among Men and Women in China. N Eng J Med 2010; 362: 1090-1101

SUPPLEMENTARY DATA

**Supplementary Table 2. Distribution of the risk factors for diabetes over time**

| Age (years)                               | MALE       |            |            |            |            |            | FEMALE     |            |            |            |            |            |
|-------------------------------------------|------------|------------|------------|------------|------------|------------|------------|------------|------------|------------|------------|------------|
|                                           | 20-29      | 30-39      | 40-49      | 50-59      | 60-69      | 70+        | 20-29      | 30-39      | 40-49      | 50-59      | 60-69      | 70+        |
| <b>Body Mass Index (kg/m<sup>2</sup>)</b> |            |            |            |            |            |            |            |            |            |            |            |            |
| 1991                                      | 21.0 (0.1) | 21.7 (0.1) | 21.8 (0.1) | 22.1 (0.1) | 21.7 (0.2) | 21.1 (0.2) | 21.2 (0.1) | 22.0 (0.1) | 22.6 (0.1) | 22.5 (0.2) | 22.4 (0.2) | 21.0 (0.2) |
| 1993                                      | 21.1 (0.1) | 21.9 (0.1) | 22.1 (0.1) | 22.1 (0.1) | 21.8 (0.2) | 21.1 (0.2) | 21.1 (0.1) | 22.0 (0.1) | 22.8 (0.1) | 22.5 (0.1) | 22.7 (0.2) | 21.2 (0.2) |
| 1997                                      | 21.4 (0.1) | 22.5 (0.1) | 22.6 (0.1) | 22.4 (0.1) | 22.5 (0.2) | 21.9 (0.2) | 21.5 (0.1) | 22.6 (0.1) | 23.0 (0.1) | 23.0 (0.1) | 23.0 (0.2) | 21.5 (0.2) |
| 2000                                      | 21.9 (0.1) | 23.0 (0.1) | 23.1 (0.1) | 22.9 (0.1) | 22.7 (0.1) | 22.3 (0.2) | 21.5 (0.1) | 22.8 (0.1) | 23.6 (0.1) | 23.8 (0.1) | 23.3 (0.2) | 22.4 (0.2) |
| 2004                                      | 22.2 (0.1) | 23.0 (0.1) | 23.5 (0.1) | 23.2 (0.1) | 22.9 (0.1) | 22.4 (0.2) | 21.4 (0.1) | 22.9 (0.1) | 23.6 (0.1) | 23.8 (0.1) | 23.6 (0.2) | 22.9 (0.2) |
| 2006                                      | 22.7 (0.2) | 23.3 (0.1) | 23.6 (0.1) | 23.3 (0.1) | 22.9 (0.1) | 22.3 (0.2) | 21.3 (0.1) | 22.6 (0.1) | 23.7 (0.1) | 23.8 (0.1) | 23.8 (0.1) | 22.9 (0.2) |
| 2009                                      | 22.1 (0.2) | 23.6 (0.1) | 24.0 (0.1) | 23.5 (0.1) | 23.3 (0.1) | 22.5 (0.2) | 21.3 (0.1) | 22.7 (0.1) | 23.8 (0.1) | 24.0 (0.1) | 23.9 (0.1) | 23.0 (0.2) |
| 2011                                      | 22.9 (0.2) | 24.1 (0.2) | 24.3 (0.1) | 24.1 (0.1) | 23.7 (0.1) | 22.9 (0.2) | 21.8 (0.2) | 23.0 (0.2) | 24.0 (0.1) | 24.5 (0.1) | 24.3 (0.1) | 23.1 (0.2) |
| P for trend*                              | <0.001     | <0.001     | <0.001     | <0.001     | <0.001     | 0.08       | <0.001     | <0.001     | <0.001     | <0.001     | <0.001     | 0.13       |
| <b>Current Smoking (%)</b>                |            |            |            |            |            |            |            |            |            |            |            |            |
| 1991                                      | 63.7       | 72.7       | 70.5       | 67.3       | 57.1       | 42.3       | 0.5        | 1.8        | 4.2        | 9.3        | 11.6       | 11.3       |
| 1993                                      | 59.2       | 70.6       | 68.8       | 69.6       | 55.0       | 45.5       | 1.0        | 1.7        | 4.2        | 8.7        | 10.7       | 9.7        |
| 1997                                      | 51.5       | 66.5       | 68.9       | 62.3       | 49.9       | 36.6       | 1.6        | 2.9        | 3.3        | 6.4        | 9.4        | 7.7        |
| 2000                                      | 54.5       | 63.8       | 64.7       | 62.4       | 51.2       | 37.2       | 1.4        | 1.7        | 3.8        | 7.2        | 8.5        | 10.4       |
| 2004                                      | 49.7       | 60.8       | 66.3       | 58.5       | 50.9       | 36.2       | 0.9        | 1.8        | 2.5        | 4.9        | 7.4        | 9.4        |
| 2006                                      | 48.0       | 58.8       | 60.5       | 58.7       | 48.8       | 32.7       | 0.4        | 1.2        | 2.0        | 4.2        | 7.3        | 7.0        |
| 2009                                      | 49.5       | 59.6       | 62.0       | 57.7       | 51.7       | 37.7       | 0.4        | 0.7        | 2.0        | 4.7        | 5.8        | 7.5        |
| 2011                                      | 50.5       | 53.7       | 59.5       | 59.5       | 45.9       | 38.5       | 0.5        | 1.1        | 1.6        | 3.1        | 4.5        | 7.8        |
| P for trend*                              | <0.001     | <0.001     | <0.001     | <0.001     | 0.1        | 0.62       | 0.57       | 0.004      | <0.001     | <0.001     | <0.001     | 0.02       |
| <b>Systolic Blood Pressure (mmHg)</b>     |            |            |            |            |            |            |            |            |            |            |            |            |
| 1991                                      | 112 (0.4)  | 113 (0.4)  | 115 (0.5)  | 124 (0.9)  | 131 (1.2)  | 137 (1.7)  | 104 (0.3)  | 108 (0.4)  | 113 (0.6)  | 121 (0.8)  | 130 (1.2)  | 135 (1.6)  |
| 1993                                      | 112 (0.4)  | 114 (0.4)  | 116 (0.5)  | 122 (0.8)  | 130 (1.1)  | 134 (1.7)  | 106 (0.4)  | 108 (0.4)  | 114 (0.6)  | 121 (0.9)  | 129 (1.1)  | 135 (1.6)  |
| 1997                                      | 115 (0.4)  | 116 (0.4)  | 119 (0.5)  | 123 (0.7)  | 132 (1.0)  | 137 (1.3)  | 108 (0.4)  | 110 (0.4)  | 116 (0.5)  | 124 (0.8)  | 132 (1.0)  | 137 (1.3)  |
| 2000                                      | 115 (0.4)  | 117 (0.4)  | 120 (0.5)  | 126 (0.6)  | 133 (0.9)  | 136 (1.1)  | 108 (0.4)  | 111 (0.4)  | 117 (0.5)  | 123 (0.7)  | 132 (0.9)  | 138 (1.2)  |
| 2004                                      | 116 (0.5)  | 119 (0.4)  | 122 (0.5)  | 127 (0.6)  | 132 (0.8)  | 138 (1.1)  | 109 (0.5)  | 112 (0.4)  | 118 (0.5)  | 125 (0.6)  | 133 (0.9)  | 139 (1.0)  |
| 2006                                      | 116 (0.6)  | 118 (0.5)  | 121 (0.5)  | 126 (0.5)  | 131 (0.8)  | 135 (1.0)  | 108 (0.5)  | 111 (0.4)  | 117 (0.5)  | 124 (0.6)  | 131 (0.8)  | 136 (1.0)  |
| 2009                                      | 116 (0.6)  | 119 (0.5)  | 124 (0.5)  | 128 (0.5)  | 133 (0.7)  | 139 (0.9)  | 109 (0.5)  | 112 (0.5)  | 120 (0.5)  | 127 (0.6)  | 134 (0.7)  | 141 (0.9)  |
| 2011                                      | 116 (0.6)  | 120 (0.5)  | 124 (0.4)  | 129 (0.5)  | 132 (0.6)  | 136 (0.8)  | 108 (0.5)  | 112 (0.5)  | 119 (0.5)  | 126 (0.6)  | 133 (0.7)  | 139 (0.9)  |
| P for trend*                              | <0.001     | <0.001     | <0.001     | <0.001     | 0.05       | 0.2        | <0.001     | <0.001     | <0.001     | <0.001     | <0.001     | 0.06       |
| <b>Physical Activity (MET-hours/week)</b> |            |            |            |            |            |            |            |            |            |            |            |            |
| 1991                                      | 395 (7.5)  | 396 (8.0)  | 404 (8.9)  | 379 (10.7) | 309 (11.1) | 221 (13.6) | 454 (8.1)  | 483 (8.8)  | 499 (9.3)  | 403 (10.9) | 303 (11.8) | 203 (11.5) |
| 1993                                      | 343 (7.2)  | 343 (7.4)  | 340 (7.7)  | 332 (9.5)  | 271 (8.8)  | 174 (11.2) | 373 (7.6)  | 408 (7.3)  | 418 (7.9)  | 348 (9.5)  | 265 (10.1) | 156 (9.1)  |
| 1997                                      | 313 (6.3)  | 335 (7.1)  | 353 (6.7)  | 318 (8.7)  | 210 (9.9)  | 105 (10.1) | 308 (6.3)  | 363 (7.3)  | 395 (7.3)  | 310 (9.2)  | 193 (9.0)  | 89 (6.9)   |

SUPPLEMENTARY DATA

|                                      |            |            |            |            |            |            |            |            |            |            |            |            |
|--------------------------------------|------------|------------|------------|------------|------------|------------|------------|------------|------------|------------|------------|------------|
| 2000                                 | 263 (7.3)  | 292 (6.7)  | 293 (6.4)  | 271 (7.6)  | 170 (8.7)  | 94 (8.3)   | 271 (7.9)  | 309 (6.5)  | 309 (6.4)  | 282 (8.2)  | 159 (7.6)  | 64 (5.1)   |
| 2004                                 | 256 (9.6)  | 286 (7.8)  | 274 (7.6)  | 249 (7.3)  | 181 (9.5)  | 82 (8.4)   | 225 (8.0)  | 272 (7.4)  | 245 (6.5)  | 209 (6.3)  | 133 (6.9)  | 50 (4.1)   |
| 2006                                 | 209 (9.5)  | 282 (8.6)  | 281 (8.0)  | 249 (7.3)  | 169 (8.6)  | 73 (7.0)   | 199 (8.8)  | 270 (7.6)  | 255 (6.9)  | 210 (6.5)  | 129 (6.2)  | 56 (4.1)   |
| 2009                                 | 175 (8.0)  | 238 (7.2)  | 245 (6.6)  | 225 (6.5)  | 155 (7.4)  | 59 (5.4)   | 173 (6.9)  | 241 (7.3)  | 258 (6.4)  | 210 (6.6)  | 155 (6.8)  | 54 (3.1)   |
| 2011                                 | 177 (8.1)  | 247 (8.1)  | 247 (6.3)  | 230 (6.8)  | 157 (6.9)  | 69 (5.7)   | 186 (8.4)  | 232 (7.4)  | 241 (5.9)  | 206 (6.2)  | 145 (5.7)  | 57 (3.3)   |
| P for trend                          | <0.001     | <0.001     | <0.001     | <0.001     | <0.001     | <0.001     | <0.001     | <0.001     | <0.001     | <0.001     | <0.001     | <0.001     |
| <b>Refined Grain, g/d</b>            |            |            |            |            |            |            |            |            |            |            |            |            |
| 1997                                 | 487 (6.7)  | 483 (6.9)  | 469 (6.8)  | 450 (8.4)  | 421 (7.8)  | 403 (10.1) | 436 (5.5)  | 447 (5.8)  | 437 (5.3)  | 426 (6.6)  | 399 (6.6)  | 391 (7.9)  |
| 2000                                 | 437 (5.7)  | 428 (5.3)  | 416 (5.2)  | 414 (6.2)  | 388 (6.6)  | 365 (8.4)  | 405 (5.6)  | 403 (4.5)  | 407 (4.4)  | 392 (5.4)  | 373 (5.5)  | 354 (6.5)  |
| 2004                                 | 436 (6.8)  | 430 (5.8)  | 404 (5.1)  | 406 (5.3)  | 411 (6.9)  | 369 (7.0)  | 397 (6.2)  | 403 (4.7)  | 387 (4.1)  | 396 (4.4)  | 386 (5.7)  | 358 (5.2)  |
| 2006                                 | 425 (8.9)  | 418 (6.3)  | 391 (5.3)  | 389 (5.2)  | 403 (6.7)  | 349 (5.9)  | 372 (7.5)  | 386 (4.9)  | 377 (4.3)  | 381 (4.2)  | 375 (5.3)  | 341 (4.6)  |
| 2009                                 | 395 (7.7)  | 396 (6.3)  | 381 (5.0)  | 371 (4.8)  | 373 (5.5)  | 344 (5.7)  | 351 (6.7)  | 365 (5.0)  | 355 (4.3)  | 356 (3.8)  | 354 (4.6)  | 328 (4.6)  |
| 2011                                 | 360 (7.0)  | 367 (6.2)  | 362 (4.4)  | 349 (4.2)  | 356 (5.0)  | 341 (4.9)  | 333 (5.4)  | 342 (4.7)  | 333 (3.6)  | 345 (3.6)  | 338 (4.2)  | 331 (4.3)  |
| P for trend*                         | <0.001     | <0.001     | <0.001     | <0.001     | <0.001     | <0.001     | <0.001     | <0.001     | <0.001     | <0.001     | <0.001     | <0.001     |
| <b>Sugar Sweetened Beverage, g/d</b> |            |            |            |            |            |            |            |            |            |            |            |            |
| 1997                                 | 1.4 (0.6)  | 0.4 (0.1)  | 0.3 (0.1)  | 0.6 (0.4)  | 0.4 (0.0)  | 0.7 (0.1)  | 0.4 (0.2)  | 0.2 (0.0)  | 0.3 (0.1)  | 0.2 (0.0)  | 0.3 (0.0)  | 0.5 (0.0)  |
| 2000                                 | 0.5 (0.1)  | 0.7 (0.2)  | 0.3 (0.0)  | 0.5 (0.2)  | 0.5 (0.0)  | 0.8 (0.0)  | 0.5 (0.1)  | 0.7 (0.3)  | 0.2 (0.0)  | 0.3 (0.0)  | 0.5 (0.2)  | 0.5 (0.0)  |
| 2004                                 | 1.1 (0.5)  | 0.3 (0.0)  | 0.8 (0.3)  | 0.5 (0.1)  | 1.9 (1.0)  | 0.6 (0.0)  | 0.7 (0.3)  | 0.7 (0.3)  | 0.4 (0.1)  | 0.4 (0.1)  | 0.6 (0.2)  | 0.6 (0.1)  |
| 2006                                 | 0.7 (0.2)  | 0.7 (0.2)  | 1.1 (0.4)  | 0.7 (0.3)  | 0.6 (0.1)  | 1.2 (0.2)  | 1.4 (1.0)  | 0.8 (0.3)  | 0.8 (0.4)  | 0.3 (0.0)  | 0.4 (0.0)  | 1.0 (0.3)  |
| 2009                                 | 5.8 (2.1)  | 2.7 (1.0)  | 1.1 (0.3)  | 1.3 (0.5)  | 0.5 (0.0)  | 1.0 (0.2)  | 1.3 (0.6)  | 0.8 (0.3)  | 1.0 (0.3)  | 0.8 (0.3)  | 0.4 (0.0)  | 0.7 (0.1)  |
| 2011                                 | 12.2 (4.8) | 6.3 (1.7)  | 6.6 (2.4)  | 2.8 (0.9)  | 4.3 (2.1)  | 1.4 (0.0)  | 3.5 (1.0)  | 2.6 (0.8)  | 2.2 (0.7)  | 1.1 (0.4)  | 1.1 (0.3)  | 0.9 (0.0)  |
| P for trend                          | 0.002      | <0.001     | 0.01       | 0.008      | 0.05       | <0.001     | <0.001     | <0.001     | 0.001      | 0.02       | 0.05       | 0.03       |
| <b>Red meat, g/d</b>                 |            |            |            |            |            |            |            |            |            |            |            |            |
| 1997                                 | 55.1 (1.9) | 61.1 (2.2) | 60.6 (2.1) | 48.8 (2.1) | 56.7 (2.5) | 60.9 (3.3) | 51.8 (1.8) | 54.9 (1.8) | 51.0 (1.7) | 50.6 (2.0) | 55.2 (2.3) | 50.8 (2.3) |
| 2000                                 | 63.7 (2.2) | 71.1 (2.4) | 64.1 (1.9) | 59.6 (2.1) | 63.1 (2.6) | 65.3 (3.3) | 58.0 (2.0) | 65.4 (1.9) | 59.4 (1.7) | 55.2 (1.9) | 60.7 (2.2) | 62.6 (3.0) |
| 2004                                 | 67.2 (2.8) | 63.4 (2.2) | 68.3 (2.2) | 59.2 (1.9) | 55.5 (2.4) | 60.3 (2.7) | 63.9 (2.4) | 60.2 (1.8) | 62.3 (1.9) | 54.4 (1.7) | 53.6 (2.1) | 58.2 (2.2) |
| 2006                                 | 78.0 (3.6) | 74.1 (2.4) | 75.3 (2.2) | 68.5 (1.9) | 60.9 (2.1) | 64.2 (2.6) | 70.0 (2.9) | 66.9 (1.9) | 67.7 (1.7) | 65.1 (1.8) | 57.8 (1.9) | 63.2 (2.2) |
| 2009                                 | 82.4 (3.6) | 80.6 (2.5) | 76.4 (2.2) | 74.9 (2.0) | 66.5 (2.1) | 65.2 (2.3) | 77.6 (3.1) | 68.1 (2.0) | 71.4 (1.8) | 66.7 (1.6) | 63.9 (1.8) | 63.2 (2.0) |
| 2011                                 | 99.3 (4.0) | 91.9 (2.9) | 81.2 (2.1) | 81.3 (2.1) | 72.4 (2.0) | 70.6 (2.3) | 85.1 (3.1) | 75.9 (2.0) | 75.7 (1.7) | 71.5 (1.6) | 66.3 (1.7) | 66.1 (1.9) |
| P for trend*                         | <0.001     | <0.001     | <0.001     | <0.001     | <0.001     | 0.002      | <0.001     | <0.001     | <0.001     | <0.001     | <0.001     | <0.001     |
| <b>Processed meat, g/d</b>           |            |            |            |            |            |            |            |            |            |            |            |            |
| 1997                                 | 1.8 (0.3)  | 2.6 (0.4)  | 2.3 (0.3)  | 1.9 (0.3)  | 2.1 (0.4)  | 2.2 (0.6)  | 2.0 (0.3)  | 2.5 (0.3)  | 2.1 (0.3)  | 1.9 (0.3)  | 1.6 (0.3)  | 1.7 (0.3)  |
| 2000                                 | 2.1 (0.4)  | 2.9 (0.3)  | 3.1 (0.4)  | 2.6 (0.4)  | 2.7 (0.5)  | 2.2 (0.5)  | 2.0 (0.3)  | 2.4 (0.3)  | 2.6 (0.3)  | 2.1 (0.3)  | 2.0 (0.3)  | 1.9 (0.5)  |
| 2004                                 | 2.6 (0.6)  | 1.9 (0.3)  | 2.2 (0.3)  | 2.2 (0.3)  | 2.0 (0.5)  | 2.2 (0.6)  | 1.9 (0.3)  | 1.8 (0.3)  | 2.2 (0.3)  | 1.5 (0.2)  | 2.0 (0.4)  | 1.7 (0.3)  |
| 2006                                 | 3.9 (0.7)  | 3.6 (0.5)  | 3.8 (0.5)  | 4.2 (0.5)  | 3.4 (0.5)  | 2.8 (0.5)  | 3.9 (0.6)  | 3.4 (0.4)  | 3.0 (0.3)  | 4.0 (0.5)  | 3.0 (0.4)  | 2.0 (0.3)  |
| 2009                                 | 6.0 (0.8)  | 4.4 (0.5)  | 4.2 (0.5)  | 3.2 (0.4)  | 4.1 (0.5)  | 2.6 (0.5)  | 4.7 (0.7)  | 4.9 (0.6)  | 3.0 (0.3)  | 2.6 (0.3)  | 2.7 (0.3)  | 2.5 (0.4)  |
| 2011                                 | 5.3 (0.9)  | 4.7 (0.7)  | 3.7 (0.4)  | 3.7 (0.4)  | 3.1 (0.4)  | 3.8 (0.6)  | 3.0 (0.5)  | 4.2 (0.5)  | 3.3 (0.4)  | 3.1 (0.4)  | 3.0 (0.4)  | 2.7 (0.4)  |
| P for trend*                         | <0.001     | <0.001     | 0.006      | 0.003      | 0.007      | 0.02       | <0.001     | <0.001     | 0.1        | 0.005      | 0.003      | 0.03       |

SUPPLEMENTARY DATA

|                                    |            |            |            |            |            |            |            |            |            |            |            |            |
|------------------------------------|------------|------------|------------|------------|------------|------------|------------|------------|------------|------------|------------|------------|
| <b>Whole grain, g/d</b>            |            |            |            |            |            |            |            |            |            |            |            |            |
| 1997                               | 2.9 (0.7)  | 3.2 (0.8)  | 4.9 (1.0)  | 4.4 (0.9)  | 4.3 (1.3)  | 2.7 (0.8)  | 4.1 (0.7)  | 4.0 (0.8)  | 5.8 (1.1)  | 4.6 (0.8)  | 4.0 (1.0)  | 3.5 (0.9)  |
| 2000                               | 2.6 (0.8)  | 4.1 (0.9)  | 3.4 (0.8)  | 4.6 (0.9)  | 5.2 (1.4)  | 3.3 (1.5)  | 3.3 (0.7)  | 3.7 (0.7)  | 3.2 (0.6)  | 5.7 (1.2)  | 4.0 (0.9)  | 3.8 (0.9)  |
| 2004                               | 3.2 (1.1)  | 2.3 (0.7)  | 3.1 (0.7)  | 2.9 (0.5)  | 2.9 (0.7)  | 2.6 (0.7)  | 1.1 (0.2)  | 2.1 (0.6)  | 3.3 (0.7)  | 2.5 (0.4)  | 3.0 (0.7)  | 3.5 (0.8)  |
| 2006                               | 4.1 (1.2)  | 3.9 (0.7)  | 4.0 (0.7)  | 4.1 (0.6)  | 2.5 (0.6)  | 3.9 (0.9)  | 2.4 (0.5)  | 2.8 (0.5)  | 4.3 (0.6)  | 4.2 (0.6)  | 3.6 (0.7)  | 3.1 (0.5)  |
| 2009                               | 1.8 (0.3)  | 2.9 (0.7)  | 3.2 (0.6)  | 3.3 (0.5)  | 3.6 (0.6)  | 4.2 (1.2)  | 4.2 (1.2)  | 3.2 (0.7)  | 3.2 (0.5)  | 3.8 (0.5)  | 4.0 (0.8)  | 2.9 (0.6)  |
| 2011                               | 4.4 (1.2)  | 4.5 (0.8)  | 4.4 (0.8)  | 5.0 (0.9)  | 5.1 (0.8)  | 2.7 (0.6)  | 3.9 (0.6)  | 6.3 (1.2)  | 4.6 (0.6)  | 4.5 (0.6)  | 5.1 (0.6)  | 4.1 (0.8)  |
| <i>P</i> for trend*                | 0.46       | 0.69       | 0.38       | 0.89       | 0.73       | 0.86       | 0.68       | 0.41       | 0.13       | 0.39       | 0.5        | 0.91       |
| <b>Low-fat dairy products, g/d</b> |            |            |            |            |            |            |            |            |            |            |            |            |
| 1997                               | 0          | 0          | 0          | 0          | 0.3 (0.2)  | 0.6 (0.6)  | 0          | 0          | 0          | 0          | 0.2 (0.2)  | 0          |
| 2000                               | 0.2 (0.2)  | 0          | 0.1 (0.1)  | 0          | 0          | 0.5 (0.5)  | 0          | 0.4 (0.2)  | 0.1 (0.1)  | 0          | 0          | 0.8 (0.8)  |
| 2004                               | 0.1 (0.01) | 0.1 (0.1)  | 0          | 0.1 (0.1)  | 0          | 0.4 (0.4)  | 0          | 0          | 0          | 0.2 (0.1)  | 0          | 0          |
| 2006                               | 0.6 (0.6)  | 0          | 0.3 (0.2)  | 0          | 0.1 (0.1)  | 0          | 0          | 0          | 0.1 (0.1)  | 0          | 0.1 (0.1)  | 0.2 (0.2)  |
| 2009                               | 0          | 0.1 (0.1)  | 0          | 0          | 0          | 0          | 0          | 0          | 0.1 (0.1)  | 0          | 0          | 0          |
| 2011                               | 0.4 (0.4)  | 0          | 0          | 0.2 (0.2)  | 0.1 (0.1)  | 0.5 (0.5)  | 0.5 (0.4)  | 0          | 0          | 0.2 (0.2)  | 0.1 (0.1)  | 0.7 (0.5)  |
| <i>P</i> for trend*                | 0.26       | 0.4        | 0.77       | 0.41       | 0.47       | 0.48       | 0.03       | 0.26       | 0.83       | 0.54       | 0.96       | 0.86       |
| <b>Nuts, g/d</b>                   |            |            |            |            |            |            |            |            |            |            |            |            |
| 1997                               | 2.4 (0.3)  | 2.6 (0.3)  | 3.7 (0.4)  | 3.1 (0.4)  | 2.9 (0.5)  | 1.5 (0.3)  | 2.1 (0.3)  | 2.1 (0.3)  | 2.7 (0.3)  | 2.2 (0.3)  | 1.8 (0.3)  | 1.6 (0.2)  |
| 2000                               | 3.2 (0.4)  | 3.8 (0.4)  | 5.0 (0.5)  | 3.8 (0.5)  | 4.2 (0.6)  | 2.3 (0.4)  | 2.5 (0.3)  | 3.2 (0.3)  | 3.5 (0.4)  | 3.4 (0.4)  | 2.8 (0.4)  | 2.6 (0.5)  |
| 2004                               | 2.6 (0.4)  | 3.8 (0.5)  | 3.6 (0.4)  | 4.4 (0.5)  | 3.3 (0.5)  | 2.7 (0.6)  | 2.9 (0.5)  | 2.6 (0.3)  | 2.8 (0.3)  | 3.1 (0.3)  | 2.1 (0.3)  | 2.7 (0.4)  |
| 2006                               | 3.9 (0.7)  | 2.6 (0.3)  | 3.7 (0.5)  | 4.2 (0.4)  | 3.8 (0.6)  | 3.6 (0.5)  | 3.1 (0.5)  | 2.4 (0.3)  | 3.5 (0.4)  | 3.7 (0.4)  | 2.5 (0.3)  | 3.0 (0.4)  |
| 2009                               | 4.3 (0.7)  | 3.7 (0.5)  | 5.0 (0.6)  | 5.5 (0.5)  | 5.6 (0.7)  | 4.7 (0.6)  | 3.5 (0.6)  | 3.5 (0.4)  | 4.0 (0.4)  | 4.3 (0.4)  | 4.2 (0.5)  | 3.0 (0.4)  |
| 2011                               | 5.6 (0.8)  | 4.3 (0.5)  | 5.8 (0.5)  | 6.8 (0.6)  | 5.5 (0.6)  | 4.8 (0.5)  | 5.4 (0.7)  | 5.2 (0.6)  | 6.6 (0.5)  | 5.8 (0.4)  | 4.5 (0.4)  | 4.2 (0.4)  |
| <i>P</i> for trend*                | <0.001     | 0.06       | 0.04       | <0.001     | 0.001      | <0.001     | <0.001     | <0.001     | <0.001     | <0.001     | <0.001     | <0.001     |
| <b>Fruit, g/day</b>                |            |            |            |            |            |            |            |            |            |            |            |            |
| 1997                               | 12.8 (1.6) | 14.2 (2.3) | 12.7 (1.7) | 10.1 (1.4) | 11.2 (1.8) | 11.6 (3.0) | 17.1 (2.1) | 17.5 (2.2) | 15.1 (1.7) | 11.7 (1.6) | 14.8 (2.3) | 12.7 (3.0) |
| 2000                               | 12.1 (1.4) | 12.8 (1.4) | 11.1 (1.1) | 14.5 (1.7) | 15.8 (2.0) | 16.0 (3.2) | 17.0 (1.8) | 18.8 (1.6) | 14.6 (1.2) | 16.6 (1.8) | 15.9 (1.7) | 18.1 (2.3) |
| 2004                               | 15.5 (2.0) | 14.1 (1.6) | 14.6 (1.4) | 17.0 (1.8) | 20.2 (2.0) | 20.5 (2.4) | 29.5 (2.8) | 23.4 (1.8) | 23.5 (1.7) | 21.7 (1.7) | 19.8 (1.6) | 20.0 (2.3) |
| 2006                               | 45.7 (5.5) | 36.5 (3.3) | 39.5 (3.3) | 39.7 (3.3) | 29.9 (2.8) | 33.1 (3.4) | 52.3 (4.8) | 50.2 (3.6) | 47.1 (3.3) | 46.5 (3.2) | 34.4 (2.8) | 32.0 (2.8) |
| 2009                               | 48.5 (4.3) | 35.2 (2.8) | 41.7 (2.7) | 38.7 (2.4) | 33.0 (2.5) | 37.2 (3.2) | 69.5 (4.8) | 53.0 (3.6) | 57.6 (3.0) | 50.1 (2.6) | 41.0 (3.0) | 39.8 (2.9) |
| 2011                               | 73.3 (5.8) | 68.8 (4.8) | 65.6 (3.3) | 58.2 (3.0) | 57.3 (3.4) | 58.6 (4.1) | 90.3 (5.7) | 78.3 (4.1) | 75.5 (3.1) | 65.3 (2.9) | 58.5 (3.0) | 59.1 (3.4) |
| <i>P</i> for trend*                | <0.001     | <0.001     | <0.001     | <0.001     | <0.001     | <0.001     | <0.001     | <0.001     | <0.001     | <0.001     | <0.001     | <0.001     |
| <b>Vegetable, g/d</b>              |            |            |            |            |            |            |            |            |            |            |            |            |
| 1997                               | 255 (4.8)  | 252 (4.7)  | 253 (4.5)  | 251 (5.5)  | 246 (5.7)  | 240 (8.6)  | 247 (4.7)  | 253 (4.3)  | 258 (4.2)  | 258 (5.3)  | 241 (5.4)  | 215 (6.0)  |
| 2000                               | 265 (5.1)  | 263 (5.0)  | 278 (4.9)  | 283 (5.5)  | 263 (6.6)  | 239 (7.1)  | 246 (5.1)  | 262 (4.5)  | 273 (4.2)  | 278 (5.6)  | 253 (5.8)  | 231 (6.4)  |
| 2004                               | 283 (6.6)  | 279 (5.6)  | 294 (5.5)  | 299 (5.4)  | 294 (6.6)  | 272 (7.6)  | 265 (5.7)  | 280 (4.8)  | 293 (4.8)  | 295 (4.5)  | 281 (6.0)  | 246 (6.0)  |
| 2006                               | 291 (8.2)  | 281 (5.3)  | 291 (4.9)  | 306 (5.0)  | 297 (6.1)  | 271 (6.3)  | 263 (6.1)  | 276 (4.8)  | 290 (4.5)  | 299 (4.4)  | 289 (5.6)  | 252 (5.5)  |
| 2009                               | 282 (7.4)  | 290 (5.5)  | 286 (4.6)  | 299 (4.7)  | 295 (5.5)  | 272 (6.2)  | 259 (5.9)  | 284 (5.1)  | 292 (4.4)  | 296 (4.2)  | 290 (4.9)  | 253 (5.1)  |
| 2011                               | 324 (8.6)  | 341 (7.4)  | 338 (5.6)  | 323 (5.4)  | 323 (5.6)  | 319 (7.5)  | 300 (7.1)  | 327 (6.2)  | 328 (4.9)  | 313 (4.5)  | 313 (4.9)  | 288 (6.0)  |

SUPPLEMENTARY DATA

| <i>P</i> for trend*          | <0.001     | <0.001     | <0.001     | <0.001     | <0.001     | <0.001     | <0.001     | <0.001     | <0.001     | <0.001     | <0.001     | <0.001     |
|------------------------------|------------|------------|------------|------------|------------|------------|------------|------------|------------|------------|------------|------------|
| <b>Fish and seafood, g/d</b> |            |            |            |            |            |            |            |            |            |            |            |            |
| 1997                         | 16.2 (1.0) | 18.8 (1.1) | 19.1 (1.1) | 15.8 (1.1) | 18.4 (1.5) | 15.1 (1.5) | 16.3 (1.0) | 17.8 (0.9) | 15.7 (0.8) | 13.5 (0.9) | 17.2 (1.3) | 14.8 (1.3) |
| 2000                         | 14.2 (0.9) | 19.7 (1.2) | 17.7 (1.0) | 19.6 (1.2) | 17.1 (1.4) | 14.7 (1.4) | 14.8 (0.9) | 17.9 (1.0) | 16.4 (0.9) | 17.4 (1.1) | 14.4 (0.9) | 14.1 (1.4) |
| 2004                         | 18.3 (1.4) | 18.2 (1.1) | 20.7 (1.1) | 21.2 (1.2) | 18.4 (1.4) | 21.0 (1.8) | 17.9 (1.5) | 17.6 (1.0) | 18.2 (1.0) | 19.0 (1.1) | 15.4 (1.1) | 14.1 (1.1) |
| 2006                         | 18.1 (2.2) | 20.2 (1.3) | 26.2 (1.4) | 23.9 (1.2) | 20.3 (1.4) | 23.3 (1.9) | 20.5 (1.8) | 18.8 (1.0) | 22.8 (1.2) | 21.0 (1.3) | 20.0 (1.4) | 17.7 (1.3) |
| 2009                         | 24.0 (1.8) | 27.1 (1.8) | 26.4 (1.3) | 27.4 (1.3) | 24.9 (1.4) | 19.7 (1.4) | 24.3 (2.0) | 25.0 (1.4) | 21.9 (1.0) | 23.1 (1.1) | 21.6 (1.4) | 15.5 (1.1) |
| 2011                         | 30.0 (2.7) | 32.3 (2.2) | 33.8 (1.7) | 36.9 (1.9) | 30.0 (1.8) | 28.4 (2.1) | 30.1 (2.4) | 34.5 (2.3) | 27.2 (1.3) | 29.8 (1.4) | 27.6 (1.6) | 24.3 (1.5) |
| <i>P</i> for trend*          | <0.001     | <0.001     | <0.001     | <0.001     | <0.001     | <0.001     | <0.001     | <0.001     | <0.001     | <0.001     | <0.001     | <0.001     |

\* To quantify time trends of the risk factors, the general linear mixed regression models was applied by including the year of each wave as a scored trend variable, the models also adjusted urban/rural area, educational level, occupation, and provinces besides the subgroup variable; A strict Bonferroni correction was applied to adjust for multiple comparisons; a *P* value <0.001 was considered.

SUPPLEMENTARY DATA

**Supplemental Figure S1. Population-Attributable-Fraction (%) of individual risk factors on risk of type 2 diabetes in 2011 by sex**

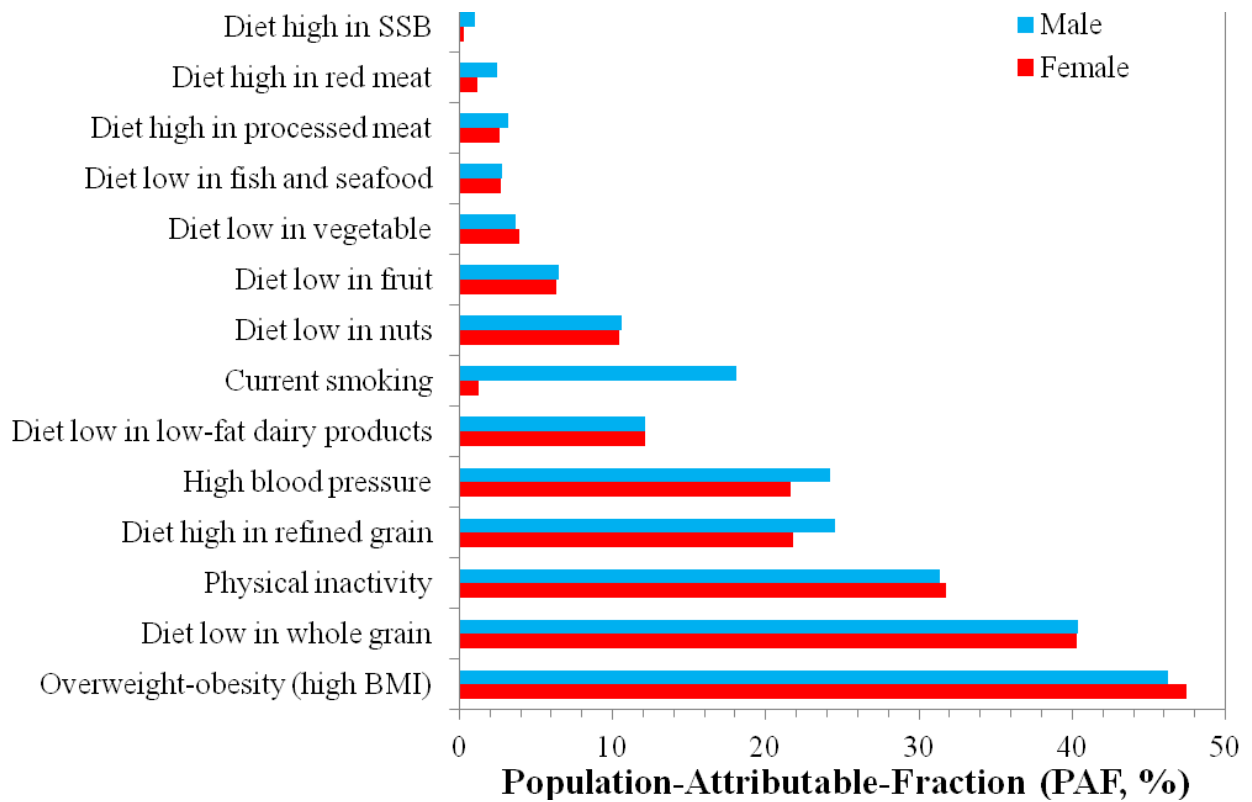

SUPPLEMENTARY DATA

**Supplementary Text. list of references for Table 1**

| Sources                                      | References                                                                                                                                                                                                                                                                         |
|----------------------------------------------|------------------------------------------------------------------------------------------------------------------------------------------------------------------------------------------------------------------------------------------------------------------------------------|
| Hartemink N et al. Am J Epidemiol 2006       | Hartemink, N., et al., <i>Combining risk estimates from observational studies with different exposure cutpoints: a meta-analysis on body mass index and diabetes type 2</i> . Am J Epidemiol, 2006. <b>163</b> (11): p. 1042-52.                                                   |
| Smith A et al Diabetologia 2016              | Smith, A.D., et al., <i>Physical activity and incident type 2 diabetes mellitus: a systematic review and dose-response meta-analysis of prospective cohort studies</i> . Diabetologia, 2016. <b>59</b> (12): p. 2527-2545.                                                         |
| Emdin C et al. J Am Coll Cardiol 2015        | Emdin, C.A., et al., <i>Usual Blood Pressure and Risk of New-Onset Diabetes: Evidence From 4.1 Million Adults and a Meta-Analysis of Prospective Studies</i> . J Am Coll Cardiol, 2015. <b>66</b> (14): p. 1552-62.                                                                |
| Pan A et al. Lancet Diabetes Endocrinol 2015 | Pan, A., et al., <i>Relation of active, passive, and quitting smoking with incident type 2 diabetes: a systematic review and meta-analysis</i> . Lancet Diabetes Endocrinol, 2015. <b>3</b> (12): p. 958-67.                                                                       |
| Imamura F et al. BMJ 2015                    | Imamura, F., et al., <i>Consumption of sugar sweetened beverages, artificially sweetened beverages, and fruit juice and incidence of type 2 diabetes: systematic review, meta-analysis, and estimation of population attributable fraction</i> . BMJ, 2015. <b>351</b> : p. h3576. |
| Pan A et al. Am J Clin Nutr 2011             | Pan A et al. Red meat consumption and risk of type 2 diabetes: 3 cohorts of US adults and an updated meta-analysis. Am J Clin Nutr. 2011; <b>94</b> (4): p. 1088-96.                                                                                                               |
| Hu EA et al. BMJ 2012                        | Hu, E.A., et al., <i>White rice consumption and risk of type 2 diabetes: meta-analysis and systematic review</i> . BMJ, 2012. <b>344</b> : p. e1454.                                                                                                                               |
| Aune D et al. Eur J Epidemiol 2013           | Aune, D., et al., <i>Whole grain and refined grain consumption and the risk of type 2 diabetes: a systematic review and dose-response meta-analysis of cohort studies</i> . Eur J Epidemiol, 2013. <b>28</b> (11): p. 845-58.                                                      |
| Tong X et al. Eur J Clin Nutr 2011           | Tong, X., et al., <i>Dairy consumption and risk of type 2 diabetes mellitus: a meta-analysis of cohort studies</i> . Eur J Clin Nutr, 2011. <b>65</b> (9): p. 1027-31.                                                                                                             |
| Wang P et al J Diabetes Investig 2016        | Wang, P.Y., et al., <i>Higher intake of fruits, vegetables or their fiber reduces the risk of type 2 diabetes: A meta-analysis</i> . J Diabetes Investig, 2016. <b>7</b> (1): p. 56-69.                                                                                            |
| Wang P et al J Diabetes Investig 2016        | Wang, P.Y., et al., <i>Higher intake of fruits, vegetables or their fiber reduces the risk of type 2 diabetes: A meta-analysis</i> . J Diabetes Investig, 2016. <b>7</b> (1): p. 56-69.                                                                                            |
| Afshin A et al. Am J Clin Nutr 2014          | Afshin, A., et al., <i>Consumption of nuts and legumes and risk of incident ischemic heart disease, stroke, and diabetes: a systematic review and meta-analysis</i> . Am J Clin Nutr, 2014. <b>100</b> (1): p. 278-88.                                                             |
| Wu J et al. (Asia) Bri J Nutr 2012           | Wu, J.H., et al., <i>Omega-3 fatty acids and incident type 2 diabetes: a systematic review and meta-analysis</i> . Br J Nutr, 2012. <b>107 Suppl 2</b> : p. S214-27.                                                                                                               |
